# Supplementary material for: Mechanisms and Evolutionary Patterns of Mammalian and Avian Dosage Compensation
Source: PLoS Biol. 2012 May 15;10(5):e1001328. doi: 10.1371/journal.pbio.1001328 (PMC3352821; doi:10.1371/journal.pbio.1001328)
Supplement: Table S1 — X(Z) to autosome, proto-X(Z) to proto-autosome, and X(Z) to proto-X(Z) expression level ratios, as well as associated p -values. (XLS) [file pbio.1001328.s019.xls]

## Sheet: XA.pXA.XpX.AllMedians.NonLog2.t
		Expressed protein-coding genes	One-sample wilcoxon test against reference value (BH-corrected)			KS P value		Expressed Conserved genes	One-sample wilcoxon test against reference value (BH-corrected)			KS p-value		proto XA	One-sample wilconx test against reference value (BH-corrected)			KS p-value		X to proto-X expression	One-sample wilcoxon test against reference value (BH-corrected)			KS p-value
		X:AA Ratio	-1	0	1	X/Z vs Autosomes		X:AA Ratio	-1	0	1	X/Z vs Autosomes		pXX:pAA ratio	-1	0	1	X/Z vs Autosomes		X:pXX ratio	-1	0	1	X/Z vs Autosomes
hsabrM		0.840196	0.00418717	1.66196e-08	1.82945e-43	0.6686		0.587586	0.993396	5.28607e-05	1.35515e-14	0.00121843		1.16864	2.52576e-07	0.56145	9.05345e-06	0.997791		0.526358	0.856732	1.17626e-12	9.85873e-23	0.00228997
hsacbM		0.767434	0.000579699	5.46057e-07	3.25971e-39	0.1362		0.55528	0.917736	2.70426e-05	5.50623e-15	0.000769122		0.989609	7.35978e-05	0.753333	5.66141e-08	0.997791		0.500353	0.841645	1.17626e-12	1.20215e-21	0.00896926
hsahtM		0.527317	0.0690228	8.01321e-10	1.82945e-43	0		0.557064	0.917736	2.04111e-05	4.2387e-14	0.000774877		1.24845	3.34909e-07	0.552811	0.000440803	0.997791		0.441023	0.331919	3.9989e-12	3.49331e-19	0.00317398
hsakdM		0.676351	0.00464865	8.74714e-09	3.57516e-43	0.0007		0.535525	0.917736	7.77161e-05	5.64268e-12	0.000769122		1.14222	6.48732e-06	0.851722	5.66518e-06	0.997791		0.531017	0.958742	1.68368e-07	1.47236e-16	0.00370671
hsalvM		0.475639	0.598564	3.5312e-13	2.80944e-48	0		0.629088	0.917736	0.00200728	1.00678e-09	0.00154307		1.46505	4.51109e-06	0.552811	0.00489694	0.997791		0.578879	0.545253	6.37635e-08	1.17248e-17	0.00317398
hsatsM		0.689075	0.000321893	1.47248e-10	2.96194e-60	0		0.280989	0.000655511	5.98697e-14	1.55482e-22	4.24882e-12		0.824159	0.0405409	0.041283	2.908e-13	0.449677		0.375006	0.331919	4.14194e-10	1.26885e-19	0.000131922
hsabrF		0.823389	9.7748e-05	3.07721e-06	6.75367e-39	0.8262		0.576241	0.917736	0.000186086	5.04396e-13	0.00121843		1.19242	1.56279e-06	0.753333	5.10896e-06	0.997791		0.536667	0.856732	3.9989e-12	1.59393e-22	0.0054594
hsacbF		0.679986	0.00103507	9.4377e-08	1.2896e-42	0.0177		0.520391	0.917736	7.4991e-06	3.76029e-15	0.000590268		1.08156	1.79627e-06	0.753333	8.39227e-07	0.997791		0.413233	0.331919	3.9989e-12	1.18382e-19	0.00130845
hsahtF		0.689608	9.7748e-05	5.94142e-06	2.86585e-37	0.001		0.69179	0.917736	0.000597173	5.64268e-12	0.00135322		1.27946	3.34909e-07	0.552811	7.90846e-05	0.997791		0.519003	0.958742	1.13681e-09	5.64301e-17	0.00317398
hsakdF		0.685685	0.0173108	1.74323e-09	1.74892e-43	0.0017		0.494368	0.960875	0.000191727	1.26193e-11	0.000769122		1.12354	0.000168893	0.753333	8.39227e-07	0.997791		0.58703	0.545253	7.88063e-07	3.05332e-16	0.0212665
ptrbrM		0.74899	3.80885e-05	0.000762414	1.3046e-26	0.1357		0.61642	0.948042	0.000250201	2.85286e-13	0.00149053		1.16888	2.74602e-07	0.559468	2.13913e-05	0.98508		0.474053	0.368521	4.88869e-13	5.18737e-21	0.00480802
ptrcbM		0.842345	7.97687e-05	0.0018725	1.01197e-25	0.7116		0.737123	0.81678	0.000498679	8.1803e-14	0.00120057		0.969437	8.91922e-05	0.745302	8.57225e-08	0.98508		0.499258	0.977958	2.82136e-12	5.18737e-21	0.058504
ptrhtM		0.746167	0.00078471	0.000297103	1.01197e-25	0.1759		0.757808	0.580219	0.017848	3.86548e-09	0.011608		1.25129	2.74602e-07	0.559468	0.00105628	0.98508		0.584861	0.368521	5.17425e-06	5.31167e-15	0.0343153
ptrkdM		0.596661	0.939651	1.9981e-11	4.84213e-40	0		0.596702	0.948042	0.000498679	4.16356e-12	0.00163205		1.13005	9.85466e-06	0.904043	6.11522e-06	0.98508		0.601534	0.368521	5.39535e-07	5.30941e-17	0.0343153
ptrlvM		0.628008	0.10865	1.55115e-07	4.98215e-31	0.0001		0.666903	0.580219	0.00973778	3.86548e-09	0.00120057		1.44131	7.99497e-06	0.559468	0.0030635	0.98508		0.543553	0.742383	6.3449e-07	4.95598e-16	0.0160693
ptrtsM		0.499863	0.939651	4.53784e-18	4.01947e-57	0		0.222547	8.35354e-06	1.7489e-15	3.0132e-22	1.92713e-12		0.822088	0.0426086	0.048627	7.70549e-13	0.606577		0.275819	0.00233321	4.88869e-13	1.24984e-20	8.10403e-05
ptrbrF		0.876462	4.07772e-08	0.0396869	7.4179e-23	1		0.724018	0.808182	0.000498679	2.15321e-13	0.00465578		1.1564	2.27123e-06	0.745302	7.15645e-06	0.98508		0.500868	0.977958	9.39416e-12	1.41882e-20	0.0357925
ptrcbF		0.791053	0.000180546	0.000407337	3.646e-28	0.134		0.69886	0.580219	0.000498679	5.61355e-14	0.0022553		1.05249	2.51671e-06	0.745302	1.60354e-06	0.98508		0.515805	0.742383	1.06463e-10	1.57427e-18	0.017464
ptrhtF		0.623757	0.161764	3.67439e-08	1.93217e-33	0.0006		0.640825	0.948042	0.000838148	2.42578e-11	0.00163205		1.2801	2.74602e-07	0.559468	0.000192644	0.991652		0.56374	0.368521	1.71022e-06	3.29284e-16	0.00448167
ptrkdF		0.625156	0.45329	1.94971e-10	1.11103e-39	0.0001		0.580942	0.81678	6.71058e-05	5.61355e-14	0.00163205		1.09694	0.000244588	0.745302	6.96317e-07	0.98508		0.499897	0.977958	6.63558e-09	5.9109e-19	0.0160693
ptrlvF		0.642054	0.153349	6.60402e-07	4.56526e-29	0.0055		0.710501	0.580219	0.00973778	2.15949e-09	0.0146313		1.72416	2.76137e-05	0.635537	0.00522097	0.98508		0.54228	0.742383	6.07998e-08	3.62215e-15	0.00480802
ppabrM		0.92337	1.10076e-05	0.00969725	1.55432e-23	1		0.827008	0.545227	0.00502044	1.09858e-11	0.0377012		1.16888	2.74602e-07	0.559468	2.13913e-05	0.98508		0.582065	0.361621	7.52972e-10	1.47408e-20	0.0252823
ppacbM		0.833189	0.000105354	0.0015567	1.7158e-26	0.9084		0.750122	0.545227	0.0015675	5.06724e-13	0.0118481		0.969437	8.91922e-05	0.745302	8.57225e-08	0.98508		0.524877	0.784094	8.31965e-11	6.87805e-20	0.140765
ppahtM		0.692049	0.00459302	7.13641e-07	2.82326e-34	0.0014		0.673745	0.670436	0.00109304	1.29492e-12	0.00407999		1.25129	2.74602e-07	0.559468	0.00105628	0.98508		0.507693	0.784094	2.80661e-08	4.197e-17	0.0197348
ppakdM		0.658664	0.0221236	4.71302e-07	1.29034e-33	0.0011		0.620225	0.91878	0.000315663	1.11816e-12	0.00225406		1.13005	9.85466e-06	0.904043	6.11522e-06	0.98508		0.550756	0.707265	4.82554e-08	6.40478e-18	0.0336138
ppalvM		0.710073	0.00878171	5.06578e-06	4.58273e-30	0.0513		0.709912	0.360985	0.0314338	5.59797e-09	0.0270661		1.44131	7.99497e-06	0.559468	0.0030635	0.98508		0.621535	0.0864356	6.53897e-05	3.70145e-13	0.0278919
ppatsM		0.395818	0.0666588	1.1126e-25	3.84676e-64	0		0.187303	1.20339e-08	1.07061e-17	1.16987e-22	0		0.822088	0.0426086	0.048627	7.70549e-13	0.606577		0.198612	3.96156e-06	1.76382e-15	5.60327e-21	4.79967e-07
ppabrF		0.764097	0.00433571	1.57691e-05	4.58273e-30	0.0627		0.656112	0.91878	7.02451e-05	3.69642e-14	0.00225406		1.1564	2.27123e-06	0.745302	7.15645e-06	0.98508		0.40034	0.198545	1.55768e-12	1.47408e-20	0.0143096
ppacbF		0.778532	0.000242402	0.000415807	1.02776e-27	0.5136		0.692175	0.91878	7.02451e-05	2.35142e-14	0.00225406		1.05249	2.51671e-06	0.745302	1.60354e-06	0.98508		0.423824	0.217649	2.60062e-12	6.87805e-20	0.0143096
ppahtF		0.799425	0.000399736	0.00103402	1.29203e-23	0.4113		0.689052	0.545227	0.00691211	7.27908e-10	0.0105365		1.2801	2.74602e-07	0.559468	0.000192644	0.991652		0.655157	0.0864356	1.26173e-05	1.06042e-15	0.0143096
ppakdF		0.69967	0.0757467	9.38845e-08	2.5445e-34	0.0009		0.676001	0.868951	0.000716789	5.07889e-12	0.00225406		1.09694	0.000244588	0.745302	6.96317e-07	0.98508		0.550097	0.707265	4.96264e-08	1.28199e-18	0.0671776
ppalvF		0.683251	0.089281	5.9927e-07	4.58273e-30	0.0062		0.745864	0.545227	0.0232609	1.53994e-08	0.0289485		1.72416	2.76137e-05	0.635537	0.00522097	0.98508		0.568862	0.346666	6.30377e-06	5.56456e-15	0.0164684
ggobrM		0.731177	0.000309965	3.42526e-05	5.48304e-32	0.0062		0.642147	0.85899	0.0002956	1.02662e-13	0.000960157		1.17197	1.71464e-07	0.449779	1.77356e-05	0.920338		0.441534	0.563385	4.8443e-13	3.50077e-21	0.00314693
ggocbM		0.723868	0.0048098	6.78752e-08	2.19583e-39	0.0019		0.621156	0.85899	7.84302e-06	8.77248e-16	0.000265888		1.00792	4.90809e-05	0.760801	1.35132e-07	0.920338		0.458889	0.563385	4.8443e-13	7.3963e-21	0.0100741
ggohtM		0.619811	0.00181846	1.08702e-06	1.1882e-33	0		0.667774	0.85899	0.000729013	2.24536e-12	0.000265888		1.25064	2.32565e-07	0.449779	0.000764791	0.920338		0.462858	0.946734	1.928e-09	4.27681e-18	0.00359613
ggokdM		0.638803	0.167904	1.12822e-08	4.19131e-37	0.0007		0.624083	0.85899	0.000378795	1.1072e-11	0.00100921		1.15663	4.60479e-06	0.760801	1.15399e-05	0.920338		0.514144	0.946734	2.17974e-08	4.75485e-18	0.0127174
ggolvM		0.687782	0.123266	1.12822e-08	4.08916e-37	0.0019		0.755433	0.85899	0.0015656	1.1072e-11	0.0218474		1.47111	3.14295e-06	0.449779	0.00789492	0.920338		0.531986	0.946734	7.49194e-08	2.27206e-17	0.00314693
ggotsM		0.598107	0.0171591	9.17649e-13	1.07416e-57	0		0.430228	0.180489	8.22209e-11	5.02272e-20	1.94832e-09		0.833275	0.0302648	0.0672434	8.28266e-13	0.637192		0.391734	0.563385	6.78461e-09	4.75485e-18	0.00314693
ggobrF		0.776635	0.000411445	8.7568e-05	2.71463e-30	0.0621		0.576211	0.85899	0.000157825	5.26714e-14	0.000394014		1.22694	1.0907e-06	0.735725	1.05919e-05	0.920338		0.493553	0.946734	8.77201e-12	1.71424e-21	0.00359613
ggocbF		0.743296	0.000309965	7.45762e-05	2.87328e-31	0.0183		0.582352	0.85899	2.9701e-05	2.16273e-15	0.000265888		1.08881	1.29192e-06	0.760801	1.86013e-06	0.920338		0.415921	0.563385	2.83964e-13	2.77144e-20	0.00314693
ggohtF		0.615914	0.00061362	1.93254e-05	2.71463e-30	0.0011		0.61677	0.85899	0.000729013	8.9788e-12	0.00033003		1.2814	2.32565e-07	0.449779	0.000131527	0.997714		0.48552	0.946734	7.49194e-08	1.19152e-15	0.00514828
ggokdF		0.691772	0.0504577	1.53624e-08	1.27835e-37	0.0018		0.669868	0.85899	0.000378795	1.66759e-12	0.00100921		1.1493	0.000114787	0.760801	1.80877e-06	0.920338		0.499692	0.946734	3.58599e-08	4.68133e-18	0.0468957
ggolvF		0.660325	0.190605	1.12822e-08	2.54662e-35	0.0012		0.712748	0.85899	0.00161628	5.12429e-11	0.00100921		1.74548	1.19013e-05	0.449779	0.0100388	0.920338		0.504746	0.946734	6.78461e-09	4.48151e-18	0.0022107
ppybrM		0.841631	8.20999e-08	0.0254747	5.86867e-23	1		0.622873	0.317373	0.00390468	1.57106e-11	0.00825734		1.17158	7.41024e-08	0.545534	1.77963e-05	0.99744		0.47929	0.626124	4.84011e-12	1.26509e-21	0.0144626
ppyhtM		0.719032	1.58536e-05	0.0006268	1.62215e-26	0.0039		0.750082	0.19625	0.0343686	8.90576e-09	0.00110184		1.23558	4.33865e-07	0.545534	0.00043725	0.99744		0.557659	0.594173	1.33386e-06	9.25665e-15	0.0477204
ppykdM		0.582583	0.0320002	1.31464e-07	3.11632e-35	0		0.587858	0.806451	0.00129169	1.38342e-11	0.00110184		1.13537	6.60326e-06	0.888934	8.16354e-06	0.99744		0.578061	0.594173	4.98761e-07	2.72144e-17	0.0311966
ppylvM		0.736613	0.000393242	0.000107727	3.96989e-29	0.1531		0.840764	0.0343783	0.204198	4.15256e-07	0.0515828		1.45062	4.87624e-06	0.545534	0.00444689	0.99744		0.572784	0.55067	1.58594e-05	9.51509e-15	0.0477204
ppybrF		0.793436	2.34764e-05	0.00156693	2.42818e-26	0.0219		0.658519	0.513635	0.00141631	1.2902e-12	0.00825734		1.22159	6.19806e-07	0.714181	8.16354e-06	0.99744		0.512354	0.793676	1.21057e-11	1.16216e-22	0.0282449
ppycbF		0.783907	0.000219583	6.97693e-05	2.25663e-32	0.1754		0.726861	0.806451	0.000409084	4.09513e-14	0.00289927		1.07738	1.73455e-06	0.766581	1.3325e-06	0.99744		0.5119	0.914374	2.11754e-11	2.27445e-20	0.0282449
ppyhtF		0.738822	1.47298e-05	0.000473571	9.99813e-29	0.0271		0.929327	0.0654081	0.137018	6.7248e-08	0.0227906		1.27035	3.9547e-07	0.545534	7.57776e-05	0.99744		0.723197	0.0528661	0.000888044	4.3427e-14	0.0964092
ppykdF		0.661952	0.0193261	4.24495e-07	8.24106e-34	0		0.522569	0.916613	0.000409084	1.2902e-12	0.000202307		1.11512	0.000194019	0.745251	1.3325e-06	0.99744		0.54627	0.594173	4.98761e-07	6.39518e-17	0.0304261
ppylvF		0.729303	0.00080476	0.00035473	7.195e-25	0.0262		0.926131	0.029194	0.372861	4.39062e-06	0.0815709		1.71218	1.73756e-05	0.556882	0.0065524	0.99744		0.604215	0.55067	3.56318e-06	9.51509e-15	0.0282449
mmlbrM		0.713307	0.00811024	3.57592e-07	3.48182e-37	0.0075		0.670347	0.274605	0.00267742	1.0065e-12	0.00664798		1.16899	4.01437e-07	0.673161	9.68825e-06	0.992166		0.543604	0.661129	6.14703e-13	8.61048e-23	0.0324323
mmlcbM		0.80447	0.000168739	3.01929e-05	3.48707e-35	0.0044		0.701913	0.971409	2.29967e-05	6.78965e-16	1.76636e-05		0.956455	0.00011844	0.775244	4.29666e-08	0.992166		0.51961	0.933813	6.14703e-13	8.61048e-23	0.0171579
mmlhtM		0.680129	0.00811024	8.27411e-08	1.23641e-38	0.0009		0.584497	0.89692	0.00041766	1.0065e-12	0.00156712		1.25652	4.01437e-07	0.673161	0.000581807	0.992166		0.53014	0.933813	2.7051e-09	1.19692e-17	0.0171579
mmlkdM		0.657764	0.00822287	4.06712e-08	8.44653e-40	0.0002		0.701812	0.89692	0.00193775	2.32868e-11	0.00448494		1.12047	1.58298e-05	0.990362	2.89592e-06	0.992166		0.541184	0.661129	1.0293e-06	4.11296e-17	0.0422242
mmllvM		0.619844	0.0109458	2.00057e-05	5.33787e-26	0.0015		0.655261	0.546183	0.0359269	1.83073e-07	0.00789102		1.43025	9.88713e-06	0.673161	0.00309623	0.992166		0.602832	0.718324	3.03742e-06	4.31643e-15	0.0236014
mmltsM		0.408112	0.0175871	6.73853e-29	1.21201e-75	0		0.218076	7.38874e-08	1.24176e-17	1.54844e-23	0		0.821955	0.0548748	0.0330544	2.72635e-13	0.476496		0.280538	0.00011809	1.86826e-15	8.61048e-23	1.76241e-06
mmlbrF		0.658928	0.000246172	4.83755e-06	4.03499e-36	0.0003		0.56792	0.546183	0.00041766	5.99544e-14	0.00122211		1.13927	3.05559e-06	0.775244	3.55211e-06	0.992166		0.55599	0.661129	7.43763e-13	8.61048e-23	0.0171579
mmlcbF		0.805806	0.00811024	1.52815e-07	3.68222e-40	0.0272		0.718562	0.929715	0.000100348	1.24726e-15	8.15254e-05		1.03227	3.47007e-06	0.809278	7.32629e-07	0.992166		0.576089	0.7237	1.33925e-10	1.23842e-20	0.0169911
mmlhtF		0.734913	0.0012997	4.89237e-06	2.6576e-33	0.005		0.742446	0.641318	0.0028465	1.60111e-11	0.00664798		1.28362	4.01437e-07	0.673161	0.000106499	0.992166		0.645746	0.2039	3.03742e-06	1.3245e-16	0.0171579
mmlkdF		0.663037	0.0141249	4.06712e-08	1.24646e-38	0.0015		0.609286	0.971409	0.000354611	1.06026e-12	0.000624589		1.09702	0.000308339	0.775244	4.51965e-07	0.992166		0.516357	0.921367	2.7051e-09	8.99068e-19	0.0422242
mmllvF		0.704464	0.00822287	3.13019e-06	3.29418e-31	0.0004		0.878649	0.0587492	0.282942	2.68861e-06	0.0688969		1.72703	3.89489e-05	0.702455	0.00413335	0.992166		0.659494	0.0303497	0.000993986	8.97965e-13	0.0330306
mmubrM		0.662184	6.52722e-11	3.42934e-43	1.235e-85	0.0008		0.473799	0.187279	7.85967e-08	3.29915e-17	1.65961e-05		1.16393	7.51284e-07	0.647582	9.35399e-06	0.943726		0.441562	0.0765105	3.38304e-15	4.53702e-22	3.07751e-05
mmucbM		0.721279	0.118106	3.28857e-22	6.039e-62	0.071		0.478255	0.187279	1.07368e-07	1.10607e-16	7.34412e-07		0.954065	0.000180434	0.762621	6.59751e-08	0.943726		0.469091	0.273898	9.71704e-14	5.1682e-21	0.000668574
mmuhtM		0.45924	1.12605e-07	7.61987e-35	2.2978e-69	0		0.395163	0.187279	8.09874e-07	7.15688e-14	1.18608e-08		1.2436	1.45184e-06	0.647582	0.000458073	0.943726		0.398519	0.072114	7.5416e-11	1.16769e-16	0.000144674
mmukdM		0.417544	4.30318e-09	3.63245e-38	6.65661e-75	0		0.379608	0.152084	5.70471e-07	3.76268e-14	6.22369e-07		1.11803	9.83518e-06	0.887486	7.76779e-06	0.943726		0.496959	0.160915	2.25725e-09	3.47569e-19	0.00094903
mmulvM		0.321851	2.90571e-11	2.76343e-38	3.32973e-69	0		0.626427	0.81506	0.00143584	7.23641e-09	0.000307155		1.38536	9.9937e-06	0.647582	0.00475567	0.943726		0.463493	0.295267	1.02169e-07	1.35185e-15	0.00736748
mmutsM		0.356307	1.09114e-24	6.12734e-90	1.04417e-157	0		0.248786	2.53788e-08	1.58272e-18	6.96809e-23	0		0.824227	0.0467387	0.0383526	3.42988e-13	0.425375		0.242881	2.7484e-05	3.38304e-15	4.6313e-21	7.04864e-07
mmubrF		0.650034	1.8175e-10	8.16202e-40	5.99068e-80	0.0002		0.495039	0.51843	1.34657e-06	4.70542e-16	5.07903e-05		1.13425	4.49265e-06	0.793189	4.99512e-06	0.943726		0.530268	0.675724	1.02596e-13	4.53702e-22	0.00094903
mmucbF		0.728169	1.05348e-05	6.46653e-31	2.2978e-69	0.1052		0.438908	0.152084	6.67176e-08	4.63123e-17	1.27462e-05		1.02771	5.76411e-06	0.847109	1.06459e-06	0.943726		0.447072	0.295267	1.39192e-12	5.7506e-21	0.000142236
mmuhtF		0.455141	8.64559e-11	3.03771e-40	7.22262e-77	0		0.346857	0.0240521	7.27523e-09	1.10607e-16	8.27539e-09		1.21946	1.39257e-06	0.647582	8.45946e-05	0.943726		0.438431	0.0765105	5.21296e-11	1.67841e-17	1.35823e-05
mmukdF		0.539913	0.000732039	6.17133e-28	2.96859e-64	0		0.456528	0.187279	1.7189e-06	3.76268e-14	9.19439e-07		1.09303	0.000210721	0.762621	8.64279e-07	0.943726		0.543645	0.772308	4.04546e-07	2.53577e-17	0.00507208
mmulvF		0.396923	4.22028e-07	5.38889e-31	1.74129e-62	0		0.592675	0.795372	0.00905732	2.14697e-07	0.000281562		1.72763	3.81053e-05	0.647582	0.00663442	0.943726		0.575227	0.87886	1.32374e-05	5.2175e-14	0.00984619
mdobrM		1.12154	3.53891e-06	0.522811	3.52806e-11	1		1.03572	0.0501458	0.617725	5.88436e-05	0.71017		1.19367	1.21853e-05	0.478643	0.00177047	0.998055		0.788876	0.00207169	0.0229698	1.41161e-11	0.337846
mdocbM		1.00934	0.0467709	0.00588602	3.79865e-15	0.7896		1.03245	0.134284	0.509433	4.06733e-05	0.71017		1.03738	0.000113653	0.724948	0.000742372	0.998055		0.856817	0.0149067	0.0161066	6.99766e-11	0.421208
mdohtM		0.921402	0.272577	0.00090522	7.95885e-18	1		0.684378	0.779145	0.01415	1.63598e-07	0.047951		1.26674	2.7203e-05	0.453478	0.0134017	0.998055		0.638647	0.647013	0.000321618	2.00663e-10	0.162757
mdokdM		0.977912	0.0020613	0.0396441	4.97941e-14	0.8484		1.0538	0.0501458	0.617725	0.000547376	0.682402		1.12196	5.65845e-05	0.637952	0.00176223	0.998055		0.787274	0.00200421	0.191117	7.57832e-08	0.636263
mdolvM		0.994376	2.37175e-05	0.361076	7.01552e-11	1		0.908847	0.0501458	0.617725	0.000748607	0.379207		1.53877	1.21853e-05	0.422528	0.0812876	0.998055		0.922373	0.039806	0.137489	9.69568e-07	0.220807
mdotsM		0.793379	0.00264572	0.00090522	4.26636e-25	0.0309		0.538518	0.375901	0.000857036	3.32829e-09	0.0129705		0.852988	0.0170306	0.422528	1.99221e-07	0.998055		0.395735	0.486619	0.000321618	1.22891e-09	0.182796
mdobrF		1.10558	0.00857333	0.030462	3.79865e-15	1		0.938484	0.0501458	0.551092	1.21738e-05	0.93119		1.27941	1.21853e-05	0.478643	0.00176223	0.998055		0.747992	0.00200421	0.0037807	4.12726e-12	0.652727
mdocbF		0.956775	0.00894525	0.0240012	2.04485e-14	0.6948		0.939976	0.269465	0.324084	5.70775e-06	0.419575		1.09568	2.64984e-05	0.478643	0.00176223	0.998055		0.704745	0.0887134	0.0037807	2.00663e-10	0.245316
mdohtF		0.975691	0.000754288	0.114614	3.14067e-12	1		0.74587	0.269465	0.187781	5.70775e-06	0.0273398		1.33291	2.64984e-05	0.422528	0.00853167	0.998055		0.633847	0.195317	0.0136945	1.15381e-08	0.182796
mdokdF		0.886358	0.0276001	0.0111515	5.95676e-15	1		0.887481	0.207867	0.37763	3.50896e-05	0.419575		1.32944	0.000110098	0.639325	0.00176223	0.998055		0.910519	0.00207169	0.139359	9.77608e-09	0.337846
mdolvF		0.795427	0.0112735	0.0240012	4.97941e-14	1		0.974812	0.0501458	0.617725	0.000442555	0.164572		1.67543	5.65845e-05	0.422528	0.0605977	0.998055		0.789705	0.0122391	0.140059	6.17965e-07	0.182796
oanbrM		0.385688	0.138944	9.69937e-09	1.09116e-15	0		0.480502	0.522088	0.00046843	2.40816e-08	0.0046598		0.535324	0.929897	0.0168206	1.72124e-07	0.0927208		0.645244	0.274362	0.00796436	9.62046e-09	0.83648
oancbM		0.471918	0.368695	3.87936e-07	1.08069e-14	0		0.514562	0.854056	0.000661276	2.82625e-10	0.00996033		0.6419	0.542429	0.0821031	8.69515e-07	0.156173		0.565002	0.274362	0.00796436	2.37105e-09	0.83648
oanhtM		0.636806	0.368695	0.00417925	5.35036e-11	0.088		0.806938	0.462508	0.225386	9.58558e-05	0.266171		0.860014	0.0544976	0.807692	0.000461784	0.561329		0.671851	0.205945	0.0319663	4.52088e-07	0.83648
oankdM		0.670712	0.368695	0.004867	5.4469e-11	0.6331		0.685838	0.719368	0.148702	2.6695e-05	0.266171		1.26025	0.0544976	0.868294	0.000593772	0.962852		0.788802	0.033629	0.0895098	9.62046e-09	0.83648
oanlvM		0.518368	0.603727	0.00847272	2.15739e-08	0.5687		0.720232	0.273119	0.526779	0.000819465	0.266171		1.40662	0.0544976	0.869648	0.00235668	0.967905		0.786093	0.033629	0.275936	4.37519e-06	0.83648
oantsM		0.509024	0.757955	1.93758e-06	1.13328e-15	0.0012		0.588697	0.719368	0.000493176	1.0103e-08	0.0122312		0.718454	0.207945	0.129749	3.6276e-06	0.443911		0.607672	0.478953	0.0319663	1.88079e-06	0.83648
oanbrF		0.733704	0.211082	0.00847272	2.31513e-11	0.3367		0.73818	0.394206	0.197951	9.97182e-06	0.266171		0.559859	0.929897	0.0168206	1.72124e-07	0.0927208		1.11549	0.00016326	0.820237	0.000383814	0.83648
oancbF		0.776664	0.0278092	0.0628642	1.12093e-09	1		0.732968	0.50737	0.197951	5.33326e-06	0.266171		0.685379	0.742658	0.0405596	2.56434e-07	0.142885		1.08105	0.000677342	0.820237	2.09214e-05	0.83648
oanhtF		0.840334	0.0278092	0.201681	7.70396e-08	1		0.987977	0.153307	0.526779	0.000716624	0.764191		0.976108	0.0544976	0.807692	0.000829789	0.443911		0.895291	0.00596051	0.756174	0.000234698	0.879325
oankdF		0.796908	0.0326715	0.201681	1.24047e-07	1		0.905196	0.153307	0.526779	0.000716624	0.977751		1.25369	0.0800736	0.868294	0.000593772	0.967905		0.95454	0.000127596	0.820237	0.000234698	0.83648
oanlvF		1.00536	0.0278092	0.724556	0.000250967	1		1.58432	0.153307	0.526779	0.091603	0.977751		1.23053	0.0159287	0.807692	0.00781775	0.967905		1.07461	0.00596051	0.820237	0.00189431	0.83648
ggabrM		0.821272	2.8978e-06	3.47767e-08	1.75508e-54	0.0003		0.857052	7.41356e-05	0.000636196	4.59513e-28	0.000280148		0.691884	0.00917902	2.69953e-05	3.04274e-26	2.85827e-05		1.06411	2.36378e-26	0.440441	1.75325e-24	0.331902
ggacbM		0.858809	0.000124062	8.38414e-09	8.35201e-57	0.006		0.835425	7.41356e-05	0.000732364	5.79619e-30	0.00544528		0.678162	0.235136	2.53311e-07	8.07281e-31	0.000166107		1.26231	1.24623e-34	0.000289654	1.50436e-15	0.0607119
ggahtM		0.755337	0.000193912	2.85477e-08	6.01682e-44	0		0.869593	0.000368766	0.0042401	3.24057e-21	5.80213e-06		0.843856	0.000303908	0.00217998	1.05718e-21	0.000175207		0.990745	6.72886e-19	0.905555	1.24143e-19	0.791241
ggakdM		0.755413	4.53591e-06	1.95521e-06	2.54051e-41	0.0046		0.852949	3.22764e-05	0.00626884	8.03557e-21	0.00236137		0.800393	3.92085e-05	0.000322172	6.49802e-26	0.000354705		1.02935	2.87135e-23	0.440441	1.2088e-19	0.777147
ggalvM		0.642584	0.0227359	3.62744e-08	2.31967e-35	0		0.740095	0.00267303	0.00220362	4.48045e-17	2.91847e-05		0.899557	3.79851e-05	0.0434036	5.65206e-17	0.0211251		0.811989	4.8089e-09	0.0117373	2.71713e-22	0.588531
ggatsM		0.951936	7.09387e-10	0.00213497	5.56462e-38	0.5341		0.852196	0.00053535	0.000795248	1.16799e-22	0.0128101		0.643476	0.028825	1.17297e-05	1.22439e-25	0.0071849		1.04775	1.78763e-20	0.424006	6.35581e-15	0.703891
ggabrF		0.567096	0.918924	5.658e-26	2.79094e-74	0		0.586344	0.81031	6.05782e-15	1.01221e-37	9.48663e-12		0.708707	0.0092313	1.98628e-05	5.84928e-27	0.000213845		0.718017	4.38842e-10	6.61249e-10	4.90886e-38	0.0473087
ggacbF		0.59077	0.826547	7.38007e-28	9.26822e-78	0		0.580939	0.621253	5.28162e-15	1.01327e-38	9.48663e-12		0.669688	0.101873	3.39506e-07	8.07281e-31	0.000166107		0.83553	4.06458e-14	0.000378957	6.78061e-29	0.0473087
ggahtF		0.619938	0.12681	1.40369e-18	8.0453e-61	0		0.687063	0.0232231	2.29071e-08	5.79619e-30	4.99353e-10		0.844752	3.79851e-05	0.0247536	4.62939e-19	0.0071849		0.736218	5.82757e-09	4.51678e-06	1.58413e-27	0.0384639
ggakdF		0.54223	0.989858	9.4209e-23	2.82553e-63	0		0.588418	0.381599	3.55826e-11	1.63321e-31	2.46203e-11		0.742897	0.000226404	6.64011e-05	1.70346e-26	0.000357194		0.749542	2.31229e-10	7.21564e-07	1.21791e-31	0.176506
ggalvF		0.578578	0.757745	8.34335e-16	2.74727e-49	0		0.622286	0.164176	3.24126e-07	2.68479e-25	2.14355e-08		0.889625	1.27849e-05	0.117173	7.38381e-16	0.0071849		0.640786	0.000542946	2.46402e-09	5.16704e-33	0.0473087
